medical students and house officers in training, thereby perpetuating a practice that may be unsafe. Such a statement and its relatively weak documentation seem inconsistent with the fine reputation, experience, and obvious position of academic excellence of the authors.

This book meets the objectives of the authors reasonably well. Some of the documentation is not as current as it might be, but the majority of it is, for all practical purposes, quite complete. The anesthesiologist particularly interested in pulmonary disease should own this book as it is certainly the most current and the most complete reference available on this broad subject.

TERRING W. HEIRONIMUS, III, M.D.  
*Department of Anesthesiology  
University of Virginia Medical Center  
Charlottesville, Virginia 22903*

**Neue Kontinuierliche Methoden zur Überwachung der Herz-Kreislauf-Funktion.** EDITED BY M. ZINDLER AND R. PURSCHKE. Bericht über den Workshop Frankfurt/Düsseldorf, Juni 1975. Price: 48 German marks.

This is the first volume of a new periodical that attempts to bridge communication barriers between several specialties and disciplines of basic science concerned with intensive care.

This volume reports the proceedings of a workshop in June 1975, and aims to give an up-to-date overview of methods for continuous surveillance of cardiovascular function. As such, it is bound to be of varied quality and interest. The basic concepts presented by Arndt, and especially by Kreuzer, are certainly noteworthy. The use of a cost-effectiveness approach to monitoring is valid and too often neglected. Krauss demonstrates the value of fiberoptic O<sub>2</sub> measurements, and some interesting possibilities of impedance cardiography are discussed by Hartung. Although there are also contributions from Holland and the United States, this book primarily informs the specialist about what was going on in continuous monitoring in West Germany in 1975.

H. F. CASCORBI, M.D., PH.D.  
*Department of Anesthesiology  
Case Western Reserve University  
School of Medicine  
Cleveland, Ohio 44106*

**Anaesthetics for Medical Students.** EDITED BY GORDON OSTLERE AND ROGER BRYCE-SMITH. Eighth edition. Pages: 140. Price: \$6.00.

An introductory text of anesthetics for American medical students who rotate for a short time through anesthesia is still needed.

The old standby, Eckenhoff-Dripps-Vandam, is excellent, but too long and somewhat stodgy. Birch and Tolmie's book, *Anesthesia for the Uninterested*, certainly is not stodgy, but obscures its many good didactic points with unnecessary and unrelated sexy pictures. So it was with interest that I looked at this book. Alas, it too falls short of the mark. Like the others, it has good points—the approach to patients facing the ordeal of an operation (p 10) is excellent, the description of an anesthetic on pages 130–132 is quite good, and throughout the book one finds valuable practical hints and information.

However, the book has too many questionable, if not outright erroneous, statements to be of value to an American medical student. To cite a few: "Jaundice after a previous halothane anesthetic will exclude the use of this drug (p 9)." "Pancuronium has little effect on pulse (p 56)." "Gallamine lasts only half an hour (p 56)." "(Chloroform) should not be given because of the chances of primary cardiac failure (p 58)." "It has recently been shown that cardiac massage can be performed without opening the chest (p 96)." Recently? Here, I think, is one of the problems of the book. It is not current, although this is an eighth, 1976, edition, and that is a pity, because I like its size.

H. F. CASCORBI, M.D., PH.D.  
*Department of Anesthesiology  
Case Western Reserve University  
School of Medicine  
Cleveland, Ohio 44106*

## Books Received

| Title & Edition                                                                                                                                                                                                         | Author/Editor                            | Publisher                                                      |       |         |
|-------------------------------------------------------------------------------------------------------------------------------------------------------------------------------------------------------------------------|------------------------------------------|----------------------------------------------------------------|-------|---------|
|                                                                                                                                                                                                                         |                                          | Address, Name, Year                                            | Pages | Price   |
| <b>Pulmonary Medicine</b>                                                                                                                                                                                               | C. A. Guenter                            | Philadelphia<br>J. B. Lippincott<br>1977                       | 829   | \$49.50 |
| <i>Clinical recognition, evaluation, and management of diseases presented within the frame of lung function, pathophysiology, diagnostic radiology, and microbiology.</i>                                               |                                          |                                                                |       |         |
| <b>Anesthesia and the Kidney</b>                                                                                                                                                                                        | R. D. Bastron<br>S. Deutsch              | New York<br>Grune and Stratton, Inc.<br>1976                   | 98    | \$11.00 |
| <i>Core information for the practitioner.</i>                                                                                                                                                                           |                                          |                                                                |       |         |
| <b>Advances and Technical Standards in Neurosurgery</b><br>Volume 3                                                                                                                                                     | H. Krayenbuhl                            | New York<br>Springer-Verlag, New York,<br>Inc.<br>1976         | 154   | \$29.60 |
| <i>Six articles on surgical management.</i>                                                                                                                                                                             |                                          |                                                                |       |         |
| <b>Cardiorespiratory Pharmacology—A Self Assessment</b>                                                                                                                                                                 | T. J. Williams<br>W. A. Syvertsen        | Chicago<br>Year Book Medical Publishers,<br>Inc.<br>1976       | 233   | \$ 9.95 |
| <i>1,388 multiple-choice questions.</i>                                                                                                                                                                                 |                                          |                                                                |       |         |
| <b>Intracranial Pressure III</b>                                                                                                                                                                                        | J. W. F. Beks<br>D. A. Bosch<br>M. Brock | New York<br>Springer-Verlag, New York,<br>Inc.<br>1976         | 354   | \$27.90 |
| <i>Includes basic concepts, trauma, subarachnoid hemorrhage, hydrocephalus, drugs and anaesthetics, patient management. A June 1976 symposium.</i>                                                                      |                                          |                                                                |       |         |
| <b>Cardiovascular Pharmacology</b>                                                                                                                                                                                      | M. J. Antonaccio                         | New York<br>Raven Press<br>1977                                | 544   | \$22.50 |
| <i>Cardiovascular pharmacology, including chapters on fundamental principles, the kidney, prostaglandins, hypertension, antiarrhythmic drugs, inotropic agents, circulatory shock, platelets, coronary circulation.</i> |                                          |                                                                |       |         |
| <b>Cerebrovascular Diseases</b> (Princeton Conference on Cerebrovascular Diseases, 10th)                                                                                                                                | P. Scheinberg                            | New York<br>Raven Press<br>1976                                | 408   | \$20.00 |
| <i>Update on transient ischemic attacks, atherosclerosis, neurotransmitter and stroke, epidemiology of cerebrovascular disease, the aging process. Based on the 1976 Princeton Conference.</i>                          |                                          |                                                                |       |         |
| <b>Acid Base Homeostasis of the Brain</b><br><b>Extracellular Fluid and the Respiratory Control System</b>                                                                                                              | H. H. Loeschcke                          | Littleton, Mass.<br>Publishing Sciences Group,<br>Inc.<br>1976 | 222   | \$20.00 |
| <i>March 1975 Symposium with six papers on exchange processes between blood, cerebrospinal and extracellular fluids and cells of the brain; 13 on neural regulation of the hydrogen ion concentration.</i>              |                                          |                                                                |       |         |
| <b>Between Life and Death</b>                                                                                                                                                                                           | H. Grant-Whyte                           | Natal, South Africa<br>Shuter & Shooter (PTY), Ltd.<br>1976    | 135   | \$10.00 |
| <i>Partly autobiographical, but mostly devoted to matters of concern to the practice of medicine and anesthesiology.</i>                                                                                                |                                          |                                                                |       |         |

Books Received (*Continued*)

| Title & Edition                                                                                                                                                                                                                                                            | Author/Editor                              | Publisher                                      |  | Pages | Price            |
|----------------------------------------------------------------------------------------------------------------------------------------------------------------------------------------------------------------------------------------------------------------------------|--------------------------------------------|------------------------------------------------|--|-------|------------------|
|                                                                                                                                                                                                                                                                            |                                            | Address, Name, Year                            |  |       |                  |
| <b>The Time of My Death</b>                                                                                                                                                                                                                                                | A. J. Breslau                              | New York<br>E. P. Dutton & Co., Inc.<br>1977   |  | 301   | \$ 9.95          |
| <i>The story of an air crash and the nineteen hospitalizations the elastomer scientist author underwent in his journey to recovery.</i>                                                                                                                                    |                                            |                                                |  |       |                  |
| <b>Introduction to Respiratory Care</b><br>Second edition                                                                                                                                                                                                                  | S. Belinkoff                               | Boston<br>Little, Brown and Company<br>1976    |  | 253   | \$ 9.95          |
| <i>The essentials necessary to intelligently performing the duties of the practitioner in respiratory care.</i>                                                                                                                                                            |                                            |                                                |  |       |                  |
| <b>Anesthesia and Pharmacology</b>                                                                                                                                                                                                                                         | J. Spierdijk<br>S. A. Feldman<br>H. Mattie | Baltimore<br>Williams and Wilkins<br>1976      |  | 347   | \$30.00          |
| <i>29 lectures from the 12th series of Boerhaave courses for postgraduate medical education, University of Leiden, The Netherlands, with a special section on professional hazards.</i>                                                                                    |                                            |                                                |  |       |                  |
| <b>Anaesthesia and Recovery Room Techniques</b><br>Second edition                                                                                                                                                                                                          | J. Wachstein                               | Baltimore<br>Williams and Wilkins<br>1976      |  | 150   | \$ 7.25          |
| <i>Essentials of preoperative preparation and postoperative management. Written for student nurses.</i>                                                                                                                                                                    |                                            |                                                |  |       |                  |
| <b>Temperature. Part I: Arts and Concepts. Benchmark Papers in Human Physiology</b><br>Volume 9                                                                                                                                                                            | T. H. Benzinger                            | New York<br>Halsted Press<br>1977              |  | 353   | \$30.00          |
| <i>21 papers covering the dawn of the temperature concept, the origin of thermometry, calorimetry, the discovery of thermoregulatory responses and the introduction of universal medical thermometry.</i>                                                                  |                                            |                                                |  |       |                  |
| <b>Mechanical Artificial Ventilation</b>                                                                                                                                                                                                                                   | T. W. Heironimus, III<br>R. A. Bageant     | Springfield, Ill.<br>Charles C. Thomas<br>1977 |  | 532   | \$24.50          |
| <i>Updated enlarged introduction to the field of respiratory therapy, and the pathophysiology of respiratory disease: Part I: When, what and how. Part II: Why.</i>                                                                                                        |                                            |                                                |  |       |                  |
| <b>Obstetric Anaesthesia and Analgesia</b>                                                                                                                                                                                                                                 | D. D. Moir                                 | Baltimore<br>Williams and Wilkins<br>1976      |  | 293   | \$23.95          |
| <i>A comprehensive guide to safe anesthesia and effective analgesia in childbirth, with chapters on history, physiology, pharmacology, modern management of pregnancy and labor, general anesthesia, regional anesthesia, complications, resuscitation of the newborn.</i> |                                            |                                                |  |       |                  |
| <b>Respiratory Physiology</b><br>Volume 2 (Series I)                                                                                                                                                                                                                       | A. C. Guyton<br>J. G. Widdicombe           | Baltimore<br>University Park Press<br>1974     |  | 381   | \$19.50          |
| <b>Science and Epilepsy:</b><br>Neuroscience Gains in Epilepsy Research                                                                                                                                                                                                    | J. L. O'Leary<br>S. Goldring               | New York<br>Raven Press<br>1976                |  | 302   | \$18.50          |
| <b>Electroanalgesie en dentisterie conservatrice</b>                                                                                                                                                                                                                       | A. Limoge<br>M. Chambrier                  | Paris, France<br>Masson et Cie.<br>1976        |  | 76    | 58 French francs |
| <b>Regional Differences in the Lung</b>                                                                                                                                                                                                                                    | J. B. West                                 | New York<br>Academic Press<br>1977             |  | 488   | \$37.00          |

## Books Received (Continued)

| Title & Edition                                                                                                                                                                                                                                                                                                                                                                                                                                                 | Author/Editor                                                        | Publisher                                                                        |                                  |
|-----------------------------------------------------------------------------------------------------------------------------------------------------------------------------------------------------------------------------------------------------------------------------------------------------------------------------------------------------------------------------------------------------------------------------------------------------------------|----------------------------------------------------------------------|----------------------------------------------------------------------------------|----------------------------------|
|                                                                                                                                                                                                                                                                                                                                                                                                                                                                 |                                                                      | Address, Name, Year                                                              | Pages Price                      |
| <b>Blood Banking and the Use of Frozen Blood Products</b>                                                                                                                                                                                                                                                                                                                                                                                                       | C. R. Valeri                                                         | Cleveland<br>CRC Press, Inc.<br>1976                                             | 417 \$49.95                      |
| <b>Journal of Advanced Nursing</b><br>Vol. 1, No. 1, Jan. 1976                                                                                                                                                                                                                                                                                                                                                                                                  | J. P. Smith                                                          | Oxford<br>Blackwell Scientific Publications<br>1976                              | 98 \$37.50                       |
| <i>This new nursing journal is an exciting and fitting introduction to the last quarter of the Twentieth Century. It aims to become an international medium for the publication of scholarly nursing papers. The journal has been developed by an Editorial Board of eminent British nurses supported by an outstanding Panel of Advisers from other countries. The first issue includes eight papers, from Britain, the United States, Israel and Denmark.</i> |                                                                      |                                                                                  |                                  |
| <b>Chinese Medical Journal</b><br>Vol. 1, 1975                                                                                                                                                                                                                                                                                                                                                                                                                  |                                                                      | Chinese Medical Assn.<br>Peking, China<br>(J. B. Lippincott)(1975)               | PNS                              |
| <b>Non-invasive Mechanical Methods in Cardiology and Cardiovascular Dynamics</b><br>(Periodical)                                                                                                                                                                                                                                                                                                                                                                | W. J. A. Goedhard                                                    | Basel, Switzerland<br>S. Karger AG, Medical & Scientific Publishers<br>1975      | \$59.25                          |
| <b>Bulletin europeen de physiopathologie respiratoire</b><br>(Bimonthly journal)                                                                                                                                                                                                                                                                                                                                                                                |                                                                      | Case Officielle, No. 10<br>54500 Vandoeuvre-les-Nancy,<br>France<br>Vol. 13 1977 | \$60.00<br>per annum<br>(240 FF) |
| <b>Neuroscience. An International Journal</b><br>Vol. 1, Number 2                                                                                                                                                                                                                                                                                                                                                                                               | P. G. Kostyuk, U.S.S.R.<br>R. Llinas, U.A.S.<br>A. D. Smith, England | Oxford, England<br>Pergamon Press<br>1976                                        | \$75.00<br>per annum             |
